Expression of Concern

# Expression of Concern: Prognostic values of inhibitory $\kappa$ B kinases mRNA expression in human gastric cancer

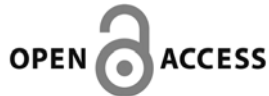

The Editorial Office has been made aware of potential issues surrounding the scientific validity of this paper, hence has issued an expression of concern to notify readers whilst the Editorial Office investigates.

Downloaded from [http://portlandpress.com/bioscierep/article-pdf/41/4/BSR-20180617\\_EOC/906880/bsr-2018-0617\\_eoc.pdf](http://portlandpress.com/bioscierep/article-pdf/41/4/BSR-20180617_EOC/906880/bsr-2018-0617_eoc.pdf) by guest on 24 April 2024

Version of Record published:  
06 April 2021
